# Supplementary material
Source: publisher figshare collection journal article supplement (https://acs.figshare.com/ndownloader/files/3921469)
Supplement: Supplementary file 1 [file 3921469]

data_amji74
_audit_creation_date              2014-02-08
_audit_creation_method
;
  Olex2 1.2
  (compiled 2013.04.25 svn.r2679, GUI svn.r4466)
;
_publ_contact_author_address      ?
_publ_contact_author_email        ?
_publ_contact_author_name         ''
_publ_contact_author_phone        ?
_chemical_formula_moiety          'C28 H34 Cl3 N3 Pd'
_chemical_formula_sum             'C28 H34 Cl3 N3 Pd'
_chemical_formula_weight          625.38
_chemical_oxdiff_formula          'C27 H32 N3 Pd Cl3'
loop_
  _atom_type_symbol
  _atom_type_scat_dispersion_real
  _atom_type_scat_dispersion_imag
  _atom_type_scat_source
  _atom_type_scat_dispersion_source
 H 0.00000 0.00000 'International Tables Volume C Table 6.1.1.4 (pp. 500-502)'
 'Henke, Gullikson and Davis, At. Data and Nucl. Data Tables, 1993, 54, 2'
 C 0.00347 0.00161 'International Tables Volume C Table 6.1.1.4 (pp. 500-502)'
 'Henke, Gullikson and Davis, At. Data and Nucl. Data Tables, 1993, 54, 2'
 Cl 0.14873 0.16029 'International Tables Volume C Table 6.1.1.4 (pp. 500-502)'
 'Henke, Gullikson and Davis, At. Data and Nucl. Data Tables, 1993, 54, 2'
 Pd -0.98845 1.01473 'International Tables Volume C Table 6.1.1.4 (pp. 500-502)'
 'Henke, Gullikson and Davis, At. Data and Nucl. Data Tables, 1993, 54, 2'
 N 0.00653 0.00323 'International Tables Volume C Table 6.1.1.4 (pp. 500-502)'
 'Henke, Gullikson and Davis, At. Data and Nucl. Data Tables, 1993, 54, 2'

_space_group_crystal_system       'orthorhombic'
_space_group_IT_number            60
_space_group_name_H-M_alt         'P b c n'
_space_group_name_Hall            '-P 2n 2ab'
loop_
  _space_group_symop_id
  _space_group_symop_operation_xyz
 1 x,y,z
 2 x+1/2,-y+1/2,-z
 3 -x,y,-z+1/2
 4 -x+1/2,-y+1/2,z+1/2
 5 -x,-y,-z
 6 -x-1/2,y-1/2,z
 7 x,-y,z-1/2
 8 x-1/2,y-1/2,-z-1/2

_cell_length_a                    13.4260(2)
_cell_length_b                    18.7561(3)
_cell_length_c                    22.6164(3)
_cell_angle_alpha                 90
_cell_angle_beta                  90
_cell_angle_gamma                 90
_cell_volume                      5695.25(15)
_cell_formula_units_Z             8
_cell_measurement_reflns_used     11529
_cell_measurement_temperature     150
_cell_measurement_theta_max       29.2480
_cell_measurement_theta_min       3.6830
_exptl_absorpt_coefficient_mu     0.955
_exptl_absorpt_correction_T_max   0.751
_exptl_absorpt_correction_T_min   0.569
_exptl_absorpt_correction_type    multi-scan
_exptl_absorpt_process_details
;
CrysAlisPro, Agilent Technologies,
Version 1.171.36.24 (release 03-12-2012 CrysAlis171 .NET)
(compiled Dec  3 2012,18:21:49)
Empirical absorption correction using spherical harmonics,
 implemented in SCALE3 ABSPACK scaling algorithm.
;
_exptl_crystal_colour             'clear yellowish yellow'
_exptl_crystal_colour_lustre      clear
_exptl_crystal_colour_modifier    yellowish
_exptl_crystal_colour_primary     yellow
_exptl_crystal_density_diffrn     1.4586
_exptl_crystal_description        block
_exptl_crystal_F_000              2260.0
_exptl_crystal_size_max           0.6
_exptl_crystal_size_mid           0.5
_exptl_crystal_size_min           0.3
_diffrn_reflns_av_R_equivalents   0.0323
_diffrn_reflns_av_unetI/netI      0.0381
_diffrn_reflns_limit_h_max        17
_diffrn_reflns_limit_h_min        -16
_diffrn_reflns_limit_k_max        24
_diffrn_reflns_limit_k_min        -23
_diffrn_reflns_limit_l_max        30
_diffrn_reflns_limit_l_min        -27
_diffrn_reflns_number             25402
_diffrn_reflns_theta_full         29.4010
_diffrn_reflns_theta_max          29.40
_diffrn_reflns_theta_min          2.80
_diffrn_ambient_temperature       150
_diffrn_detector_area_resol_mean  10.3705
_diffrn_measured_fraction_theta_full 0.9969
_diffrn_measured_fraction_theta_max 0.9969
_diffrn_measurement_details
;
#__ type_ start__ end____ width___ exp.time_
  1 omega  -20.00    5.00   1.0000    6.0000
omega____ theta____ kappa____ phi______ frames
    -      -11.6555  -99.0000  120.0000 25

#__ type_ start__ end____ width___ exp.time_
  2 omega  -50.00   68.00   1.0000    6.0000
omega____ theta____ kappa____ phi______ frames
    -      -11.6555   19.0000  150.0000 118

#__ type_ start__ end____ width___ exp.time_
  3 omega  -45.00  -17.00   1.0000    6.0000
omega____ theta____ kappa____ phi______ frames
    -      -11.6555   77.0000  -60.0000 28
;
_diffrn_measurement_device_type   'SuperNova, Single source at offset), Atlas'
_diffrn_measurement_method        '\w scans'
_diffrn_orient_matrix_UB_11       -0.0451557000
_diffrn_orient_matrix_UB_12       -0.0085630000
_diffrn_orient_matrix_UB_13       0.0146409000
_diffrn_orient_matrix_UB_21       0.0258088000
_diffrn_orient_matrix_UB_22       -0.0248309000
_diffrn_orient_matrix_UB_23       0.0180402000
_diffrn_orient_matrix_UB_31       0.0092961000
_diffrn_orient_matrix_UB_32       0.0271978000
_diffrn_orient_matrix_UB_33       0.0210702000
_diffrn_radiation_monochromator   mirror
_diffrn_radiation_type            'Mo K\a'
_diffrn_radiation_wavelength      0.7107
_diffrn_source                    'SuperNova (Mo) X-ray Source'
_reflns_Friedel_coverage          0.0
_reflns_limit_h_max               17
_reflns_limit_h_min               0
_reflns_limit_k_max               24
_reflns_limit_k_min               0
_reflns_limit_l_max               30
_reflns_limit_l_min               0
_reflns_number_gt                 5464
_reflns_number_total              6969
_reflns_odcompleteness_completeness 99.69
_reflns_odcompleteness_iscentric  1
_reflns_odcompleteness_theta      26.32
_reflns_threshold_expression      I>=2u(I)
_computing_cell_refinement
;
CrysAlisPro, Agilent Technologies,
Version 1.171.36.24 (release 03-12-2012 CrysAlis171 .NET)
(compiled Dec  3 2012,18:21:49)
;
_computing_data_collection
;
CrysAlisPro, Agilent Technologies,
Version 1.171.36.24 (release 03-12-2012 CrysAlis171 .NET)
(compiled Dec  3 2012,18:21:49)
;
_computing_data_reduction
;
CrysAlisPro, Agilent Technologies,
Version 1.171.36.24 (release 03-12-2012 CrysAlis171 .NET)
(compiled Dec  3 2012,18:21:49)
;
_computing_molecular_graphics
;
O. V. Dolomanov, L. J. Bourhis, R. J. Gildea, J. A. K. Howard and H. Puschmann,
OLEX2: a complete structure solution, refinement and analysis program.
J. Appl. Cryst. (2009). 42, 339-341.
;
_computing_publication_material
;
O. V. Dolomanov, L. J. Bourhis, R. J. Gildea, J. A. K. Howard and H. Puschmann,
OLEX2: a complete structure solution, refinement and analysis program.
J. Appl. Cryst. (2009). 42, 339-341.
;
_computing_structure_refinement
;
olex2.refine (L.J. Bourhis, O.V. Dolomanov, R.J. Gildea, J.A.K. Howard,
H. Puschmann, in preparation, 2011)
;
_computing_structure_solution
;
olex2.solve (L.J. Bourhis, O.V. Dolomanov, R.J. Gildea, J.A.K. Howard,
H. Puschmann, in preparation, 2011)
;
_refine_diff_density_max          0.5954
_refine_diff_density_min          -0.7201
_refine_diff_density_rms          0.1475
_refine_ls_d_res_high             0.7239
_refine_ls_d_res_low              7.2791
_refine_ls_goodness_of_fit_ref    1.1052
_refine_ls_hydrogen_treatment     mixed
_refine_ls_matrix_type            full
_refine_ls_number_constraints     52
_refine_ls_number_parameters      321
_refine_ls_number_reflns          6969
_refine_ls_number_restraints      0
_refine_ls_R_factor_all           0.0546
_refine_ls_R_factor_gt            0.0353
_refine_ls_restrained_S_all       1.1052
_refine_ls_shift/su_max           0.0010
_refine_ls_shift/su_mean          0.0003
_refine_ls_structure_factor_coef  Fsqd
_refine_ls_weighting_details
'w=1/[\s^2^(Fo^2^)+(0.0210P)^2^+6.3372P] where P=(Fo^2^+2Fc^2^)/3'
_refine_ls_weighting_scheme       calc
_refine_ls_wR_factor_ref          0.0770
_olex2_refinement_description
;
1. Fixed Uiso
 At 1.2 times of:
  All C(H) groups, All C(H,H) groups
 At 1.5 times of:
  All C(H,H,H) groups
2.a Secondary CH2 refined with riding coordinates:
 C5(H5a,H5b), C2(H2a,H2b), C4(H4a,H4b), C3(H3a,H3b)
2.b Aromatic/amide H refined with riding coordinates:
 C11(H11), C25(H25), C28(H28), C12(H12), C24(H24), C27(H27), C21(H21), C20(H20)
2.c Idealised Me refined as rotating group:
 C9(H9a,H9b,H9c), C23(H23a,H23b,H23c), C16(H16a,H16b,H16c), C17(H17a,H17b,
 H17c), C10(H10a,H10b,H10c), C14(H14a,H14b,H14c)
;
_atom_sites_solution_primary      iterative
loop_
  _atom_site_label
  _atom_site_type_symbol
  _atom_site_fract_x
  _atom_site_fract_y
  _atom_site_fract_z
  _atom_site_U_iso_or_equiv
  _atom_site_adp_type
  _atom_site_occupancy
  _atom_site_refinement_flags_posn
 Pd1 Pd 0.713365(15) 0.548057(10) 0.659598(8) 0.01706(6) Uani 1.000000 .
 Cl1 Cl 0.64322(5) 0.46606(3) 0.59534(3) 0.02506(14) Uani 1.000000 .
 Cl3 Cl 0.65101(8) 0.28087(4) 0.76811(4) 0.0550(3) Uani 1.000000 .
 N3 N 0.66301(16) 0.48501(11) 0.73045(9) 0.0190(5) Uani 1.000000 .
 N1 N 0.70101(17) 0.66489(11) 0.57633(9) 0.0223(5) Uani 1.000000 .
 C9 C 0.8562(2) 0.46023(14) 0.52104(12) 0.0258(6) Uani 1.000000 .
 H9a H 0.7965(7) 0.4883(7) 0.5193(4) 0.0387(9) Uiso 1.000000 GR
 H9b H 0.8956(6) 0.4690(9) 0.48635(13) 0.0387(9) Uiso 1.000000 GR
 H9c H 0.8392(12) 0.4106(3) 0.5229(4) 0.0387(9) Uiso 1.000000 GR
 N2 N 0.85089(17) 0.60318(11) 0.57266(9) 0.0217(5) Uani 1.000000 .
 C1 C 0.7603(2) 0.61177(13) 0.59532(11) 0.0182(5) Uani 1.000000 .
 C6 C 0.91825(19) 0.55005(13) 0.59730(11) 0.0208(5) Uani 1.000000 .
 C7 C 0.91507(19) 0.48045(14) 0.57520(11) 0.0214(5) Uani 1.000000 .
 C5 C 0.8807(2) 0.63538(15) 0.51536(12) 0.0324(7) Uani 1.000000 .
 H5a H 0.9352(2) 0.60793(15) 0.49874(12) 0.0388(8) Uiso 1.000000 R
 H5b H 0.8251(2) 0.63260(15) 0.48808(12) 0.0388(8) Uiso 1.000000 R
 C11 C 0.9747(2) 0.42951(14) 0.60287(12) 0.0268(6) Uani 1.000000 .
 H11 H 0.9708(2) 0.38237(14) 0.59033(12) 0.0322(7) Uiso 1.000000 R
 C25 C 0.6717(2) 0.41388(14) 0.72917(11) 0.0228(6) Uani 1.000000 .
 H25 H 0.7041(2) 0.39237(14) 0.69750(11) 0.0274(7) Uiso 1.000000 R
 C13 C 1.0394(2) 0.44656(16) 0.64827(13) 0.0313(7) Uani 1.000000 .
 C15 C 0.5943(2) 0.65922(13) 0.58540(11) 0.0209(5) Uani 1.000000 .
 C23 C 0.2776(2) 0.63945(18) 0.60699(14) 0.0383(8) Uani 1.000000 .
 H23a H 0.2593(3) 0.6547(11) 0.6460(4) 0.0574(11) Uiso 1.000000 GR
 H23b H 0.2443(2) 0.6686(9) 0.5783(6) 0.0574(11) Uiso 1.000000 GR
 H23c H 0.2586(3) 0.5906(3) 0.6015(9) 0.0574(11) Uiso 1.000000 GR
 C26 C 0.6338(2) 0.37206(14) 0.77358(12) 0.0286(6) Uani 1.000000 .
 C22 C 0.3887(2) 0.64654(14) 0.59936(12) 0.0260(6) Uani 1.000000 .
 C28 C 0.5765(2) 0.47554(16) 0.82216(12) 0.0302(7) Uani 1.000000 .
 H28 H 0.5443(2) 0.49804(16) 0.85345(12) 0.0363(8) Uiso 1.000000 R
 C16 C 0.5875(2) 0.59106(16) 0.48857(12) 0.0305(7) Uani 1.000000 .
 H16a H 0.6156(13) 0.62884(19) 0.4653(5) 0.0458(10) Uiso 1.000000 GR
 H16b H 0.6392(10) 0.5585(8) 0.50002(12) 0.0458(10) Uiso 1.000000 GR
 H16c H 0.5383(4) 0.5662(9) 0.4657(4) 0.0458(10) Uiso 1.000000 GR
 C2 C 0.7315(2) 0.73272(15) 0.54649(13) 0.0319(7) Uani 1.000000 .
 H2a H 0.7223(2) 0.72727(15) 0.50419(13) 0.0382(9) Uiso 1.000000 R
 H2b H 0.6878(2) 0.77070(15) 0.55963(13) 0.0382(9) Uiso 1.000000 R
 C19 C 0.5486(2) 0.69371(14) 0.63285(12) 0.0244(6) Uani 1.000000 .
 C12 C 1.0458(2) 0.51687(16) 0.66590(13) 0.0326(7) Uani 1.000000 .
 H12 H 1.0911(2) 0.52925(16) 0.69527(13) 0.0391(8) Uiso 1.000000 R
 C17 C 0.6053(2) 0.73971(15) 0.67555(13) 0.0318(7) Uani 1.000000 .
 H17a H 0.6740(4) 0.7255(7) 0.6760(7) 0.0477(10) Uiso 1.000000 GR
 H17b H 0.6005(12) 0.78867(19) 0.6635(5) 0.0477(10) Uiso 1.000000 GR
 H17c H 0.5776(10) 0.7344(8) 0.7144(2) 0.0477(10) Uiso 1.000000 GR
 C24 C 0.6172(2) 0.51474(15) 0.77678(12) 0.0255(6) Uani 1.000000 .
 H24 H 0.6127(2) 0.56418(15) 0.77842(12) 0.0306(7) Uiso 1.000000 R
 C27 C 0.5842(2) 0.40197(16) 0.82035(13) 0.0327(7) Uani 1.000000 .
 H27 H 0.5566(2) 0.37376(16) 0.84993(13) 0.0392(8) Uiso 1.000000 R
 C21 C 0.4459(2) 0.68563(14) 0.63897(12) 0.0261(6) Uani 1.000000 .
 H21 H 0.4144(2) 0.70730(14) 0.67087(12) 0.0313(7) Uiso 1.000000 R
 C4 C 0.9130(3) 0.71275(16) 0.52117(15) 0.0414(8) Uani 1.000000 .
 H4a H 0.9780(3) 0.71493(16) 0.53975(15) 0.0497(10) Uiso 1.000000 R
 H4b H 0.9183(3) 0.73398(16) 0.48219(15) 0.0497(10) Uiso 1.000000 R
 C3 C 0.8382(3) 0.75470(15) 0.55806(15) 0.0382(8) Uani 1.000000 .
 H3a H 0.8455(3) 0.80508(15) 0.54940(15) 0.0459(9) Uiso 1.000000 R
 H3b H 0.8531(3) 0.74777(15) 0.59964(15) 0.0459(9) Uiso 1.000000 R
 C20 C 0.4371(2) 0.61550(14) 0.55134(11) 0.0248(6) Uani 1.000000 .
 H20 H 0.3999(2) 0.58974(14) 0.52401(11) 0.0297(7) Uiso 1.000000 R
 C8 C 0.9863(2) 0.56990(15) 0.64093(12) 0.0264(6) Uani 1.000000 .
 C10 C 1.0022(2) 0.64610(15) 0.65980(14) 0.0342(7) Uani 1.000000 .
 H10a H 1.0438(12) 0.6698(3) 0.6315(5) 0.0513(10) Uiso 1.000000 GR
 H10b H 0.9390(3) 0.6700(3) 0.6621(9) 0.0513(10) Uiso 1.000000 GR
 H10c H 1.0337(14) 0.64700(15) 0.6979(4) 0.0513(10) Uiso 1.000000 GR
 C14 C 1.1040(3) 0.39012(19) 0.67706(18) 0.0532(10) Uani 1.000000 .
 H14a H 1.0917(14) 0.3448(3) 0.6587(8) 0.0799(15) Uiso 1.000000 GR
 H14b H 1.1729(3) 0.4026(7) 0.6724(10) 0.0799(15) Uiso 1.000000 GR
 H14c H 1.0882(14) 0.3872(10) 0.7184(3) 0.0799(15) Uiso 1.000000 GR
 C18 C 0.5394(2) 0.62190(13) 0.54305(11) 0.0232(6) Uani 1.000000 .
 Cl2 Cl 0.78306(6) 0.62333(3) 0.72794(3) 0.02805(15) Uani 1.000000 .

loop_
  _atom_site_aniso_label
  _atom_site_aniso_U_11
  _atom_site_aniso_U_22
  _atom_site_aniso_U_33
  _atom_site_aniso_U_12
  _atom_site_aniso_U_13
  _atom_site_aniso_U_23
 Pd1 0.01909(10) 0.01699(10) 0.01511(10) -0.00075(8) 0.00119(8) 0.00062(7)
 Cl1 0.0283(3) 0.0279(3) 0.0190(3) -0.0063(3) 0.0021(3) -0.0044(2)
 Cl3 0.0850(7) 0.0222(4) 0.0577(5) -0.0075(4) 0.0105(5) 0.0085(4)
 N3 0.0179(11) 0.0221(11) 0.0172(11) -0.0013(9) 0.0007(9) -0.0000(8)
 N1 0.0270(13) 0.0200(11) 0.0200(11) -0.0007(9) 0.0023(10) 0.0043(9)
 C9 0.0231(14) 0.0290(14) 0.0253(14) -0.0009(12) 0.0029(12) -0.0048(11)
 N2 0.0248(12) 0.0220(11) 0.0183(11) 0.0003(10) 0.0052(10) 0.0024(9)
 C1 0.0212(13) 0.0165(12) 0.0169(12) -0.0018(10) 0.0001(11) -0.0020(10)
 C6 0.0153(12) 0.0237(13) 0.0233(13) -0.0022(11) 0.0037(11) 0.0036(11)
 C7 0.0174(13) 0.0254(13) 0.0214(13) -0.0027(11) 0.0047(11) 0.0003(10)
 C5 0.0370(18) 0.0351(16) 0.0250(15) 0.0054(14) 0.0134(14) 0.0075(12)
 C11 0.0246(15) 0.0250(14) 0.0309(15) -0.0001(11) 0.0072(13) 0.0013(11)
 C25 0.0227(14) 0.0238(13) 0.0219(13) 0.0003(11) -0.0003(12) -0.0010(11)
 C13 0.0225(14) 0.0342(16) 0.0373(17) 0.0033(13) 0.0008(13) 0.0049(13)
 C15 0.0234(14) 0.0195(13) 0.0198(13) 0.0029(11) 0.0006(11) 0.0049(10)
 C23 0.0285(17) 0.053(2) 0.0333(17) 0.0004(15) 0.0001(14) 0.0043(15)
 C26 0.0333(17) 0.0214(13) 0.0312(15) -0.0072(12) -0.0041(14) 0.0051(11)
 C22 0.0269(15) 0.0280(14) 0.0230(14) 0.0018(12) -0.0012(12) 0.0102(11)
 C28 0.0293(16) 0.0405(17) 0.0209(14) -0.0032(13) 0.0060(13) -0.0024(12)
 C16 0.0360(17) 0.0342(16) 0.0214(14) 0.0020(14) -0.0001(13) -0.0033(12)
 C2 0.0390(19) 0.0230(14) 0.0336(16) 0.0037(13) 0.0066(14) 0.0109(12)
 C19 0.0297(15) 0.0233(13) 0.0201(13) 0.0035(12) -0.0040(12) 0.0025(11)
 C12 0.0217(15) 0.0406(17) 0.0354(17) -0.0046(13) -0.0056(13) -0.0007(14)
 C17 0.0310(16) 0.0345(16) 0.0299(16) 0.0039(13) -0.0035(13) -0.0067(12)
 C24 0.0240(14) 0.0281(14) 0.0243(14) 0.0006(12) 0.0019(12) -0.0015(11)
 C27 0.0311(17) 0.0420(18) 0.0249(15) -0.0116(14) 0.0015(13) 0.0078(13)
 C21 0.0311(16) 0.0277(14) 0.0195(13) 0.0066(12) 0.0029(12) 0.0017(11)
 C4 0.0379(19) 0.0383(17) 0.048(2) -0.0035(15) 0.0154(17) 0.0174(15)
 C3 0.045(2) 0.0227(15) 0.0472(19) -0.0059(14) 0.0103(17) 0.0091(13)
 C20 0.0318(16) 0.0235(13) 0.0190(13) 0.0012(12) -0.0050(12) 0.0027(11)
 C8 0.0229(14) 0.0315(15) 0.0248(14) -0.0052(12) 0.0047(12) -0.0027(11)
 C10 0.0311(16) 0.0325(15) 0.0391(17) -0.0081(13) -0.0005(15) -0.0065(13)
 C14 0.040(2) 0.047(2) 0.073(3) 0.0083(17) -0.017(2) 0.0118(19)
 C18 0.0320(16) 0.0193(13) 0.0182(13) 0.0051(11) -0.0019(12) 0.0038(10)
 Cl2 0.0349(4) 0.0264(3) 0.0229(3) -0.0080(3) -0.0039(3) -0.0022(3)

loop_
  _geom_bond_atom_site_label_1
  _geom_bond_atom_site_label_2
  _geom_bond_distance
  _geom_bond_site_symmetry_2
 Pd1 Cl1 2.3161(6) .
 Pd1 N3 2.103(2) .
 Pd1 C1 1.984(2) .
 Pd1 Cl2 2.2929(7) .
 Cl3 C26 1.730(3) .
 N3 C25 1.340(3) .
 N3 C24 1.337(3) .
 N1 C1 1.346(3) .
 N1 C15 1.451(3) .
 N1 C2 1.497(3) .
 C9 C7 1.506(4) .
 N2 C1 1.330(3) .
 N2 C6 1.457(3) .
 N2 C5 1.485(3) .
 C6 C7 1.399(4) .
 C6 C8 1.395(4) .
 C7 C11 1.395(4) .
 C5 C4 1.520(4) .
 C11 C13 1.383(4) .
 C25 C26 1.372(4) .
 C13 C12 1.380(4) .
 C13 C14 1.515(4) .
 C15 C19 1.395(4) .
 C15 C18 1.396(4) .
 C23 C22 1.507(4) .
 C26 C27 1.370(4) .
 C22 C21 1.389(4) .
 C22 C20 1.393(4) .
 C28 C24 1.376(4) .
 C28 C27 1.384(4) .
 C16 C18 1.506(4) .
 C2 C3 1.513(4) .
 C19 C17 1.502(4) .
 C19 C21 1.394(4) .
 C12 C8 1.396(4) .
 C4 C3 1.524(4) .
 C20 C18 1.392(4) .
 C8 C10 1.507(4) .

loop_
  _geom_angle_atom_site_label_1
  _geom_angle_atom_site_label_2
  _geom_angle_atom_site_label_3
  _geom_angle
  _geom_angle_site_symmetry_1
  _geom_angle_site_symmetry_3
 N3 Pd1 Cl1 88.51(6) . .
 C1 Pd1 Cl1 93.97(7) . .
 C1 Pd1 N3 177.15(9) . .
 Cl2 Pd1 Cl1 176.16(2) . .
 Cl2 Pd1 N3 87.92(6) . .
 Cl2 Pd1 C1 89.63(7) . .
 C25 N3 Pd1 121.04(17) . .
 C24 N3 Pd1 120.71(17) . .
 C24 N3 C25 118.2(2) . .
 C15 N1 C1 119.0(2) . .
 C2 N1 C1 127.7(2) . .
 C2 N1 C15 113.3(2) . .
 C6 N2 C1 120.2(2) . .
 C5 N2 C1 122.3(2) . .
 C5 N2 C6 116.4(2) . .
 N1 C1 Pd1 119.47(19) . .
 N2 C1 Pd1 119.98(18) . .
 N2 C1 N1 120.5(2) . .
 C7 C6 N2 118.9(2) . .
 C8 C6 N2 119.6(2) . .
 C8 C6 C7 121.5(2) . .
 C6 C7 C9 122.8(2) . .
 C11 C7 C9 119.6(2) . .
 C11 C7 C6 117.5(2) . .
 C4 C5 N2 112.9(2) . .
 C13 C11 C7 122.4(3) . .
 C26 C25 N3 121.4(2) . .
 C12 C13 C11 118.3(3) . .
 C14 C13 C11 121.1(3) . .
 C14 C13 C12 120.5(3) . .
 C19 C15 N1 120.6(2) . .
 C18 C15 N1 117.4(2) . .
 C18 C15 C19 121.9(3) . .
 C25 C26 Cl3 117.6(2) . .
 C27 C26 Cl3 121.7(2) . .
 C27 C26 C25 120.8(3) . .
 C21 C22 C23 121.3(3) . .
 C20 C22 C23 120.9(3) . .
 C20 C22 C21 117.8(3) . .
 C27 C28 C24 118.7(3) . .
 C3 C2 N1 114.4(2) . .
 C17 C19 C15 122.5(3) . .
 C21 C19 C15 117.5(2) . .
 C21 C19 C17 120.0(2) . .
 C8 C12 C13 121.9(3) . .
 C28 C24 N3 123.0(3) . .
 C28 C27 C26 117.9(3) . .
 C19 C21 C22 122.7(3) . .
 C3 C4 C5 110.6(2) . .
 C4 C3 C2 112.8(3) . .
 C18 C20 C22 121.9(3) . .
 C12 C8 C6 118.1(3) . .
 C10 C8 C6 123.1(3) . .
 C10 C8 C12 118.7(3) . .
 C16 C18 C15 121.9(3) . .
 C20 C18 C15 118.1(2) . .
 C20 C18 C16 120.0(2) . .

#===END

data_amji83_refinalise
_audit_creation_date              2013-11-07
_audit_creation_method
;
Olex2 1.2
(compiled 2013.09.17 svn.r2790 for OlexSys, GUI svn.r4601)
;
_publ_contact_author_address      ?
_publ_contact_author_email        ?
_publ_contact_author_name         ''
_publ_contact_author_phone        ?
_chemical_formula_moiety          'C27 H32 Cl3 N3 Pd, C Cl2'
_chemical_formula_sum             'C28 H32 Cl5 N3 Pd'
_chemical_formula_weight          694.26
_chemical_oxdiff_formula          'C28 H34 N3 Cl5 Pd1'
loop_
  _atom_type_symbol
  _atom_type_scat_dispersion_real
  _atom_type_scat_dispersion_imag
  _atom_type_scat_Cromer_Mann_a1
  _atom_type_scat_Cromer_Mann_a2
  _atom_type_scat_Cromer_Mann_a3
  _atom_type_scat_Cromer_Mann_a4
  _atom_type_scat_Cromer_Mann_b1
  _atom_type_scat_Cromer_Mann_b2
  _atom_type_scat_Cromer_Mann_b3
  _atom_type_scat_Cromer_Mann_b4
  _atom_type_scat_Cromer_Mann_c
  _atom_type_scat_source
  _atom_type_scat_dispersion_source
 H 0.00000 0.00000 0.49300 0.32291 0.14019 0.04081 10.51090 26.12570 3.14236
 57.79970 0.0030380000826
 'International Tables Volume C Table 6.1.1.4 (pp. 500-502)'
 'Henke, Gullikson and Davis, At. Data and Nucl. Data Tables, 1993, 54, 2'
 C 0.00347 0.00161 2.31000 1.02000 1.58860 0.86500 20.84390 10.20750 0.56870
 51.65120 0.215599998832
 'International Tables Volume C Table 6.1.1.4 (pp. 500-502)'
 'Henke, Gullikson and Davis, At. Data and Nucl. Data Tables, 1993, 54, 2'
 Cl 0.14873 0.16029 11.46040 7.19640 6.25560 1.64550 0.01040 1.16620 18.51940
 47.77840 -9.55739974976
 'International Tables Volume C Table 6.1.1.4 (pp. 500-502)'
 'Henke, Gullikson and Davis, At. Data and Nucl. Data Tables, 1993, 54, 2'
 Pd -0.98845 1.01473 19.33190 15.50170 5.29537 0.60584 0.69866 7.98929
 25.20520 76.89860 5.26593017578
 'International Tables Volume C Table 6.1.1.4 (pp. 500-502)'
 'Henke, Gullikson and Davis, At. Data and Nucl. Data Tables, 1993, 54, 2'
 N 0.00653 0.00323 12.21260 3.13220 2.01250 1.16630 0.00570 9.89330 28.99750
 0.58260 -11.5290002823
 'International Tables Volume C Table 6.1.1.4 (pp. 500-502)'
 'Henke, Gullikson and Davis, At. Data and Nucl. Data Tables, 1993, 54, 2'

_space_group_crystal_system       'triclinic'
_space_group_IT_number            2
_space_group_name_H-M_alt         'P -1'
_space_group_name_Hall            '-P 1'
loop_
  _space_group_symop_id
  _space_group_symop_operation_xyz
 1 x,y,z
 2 -x,-y,-z

_symmetry_Int_Tables_number       2
_cell_length_a                    8.2390(3)
_cell_length_b                    11.7585(3)
_cell_length_c                    16.6772(8)
_cell_angle_alpha                 89.667(3)
_cell_angle_beta                  84.171(3)
_cell_angle_gamma                 71.431(3)
_cell_volume                      1523.03(10)
_cell_formula_units_Z             2
_cell_measurement_reflns_used     7343
_cell_measurement_temperature     150.00(10)
_cell_measurement_theta_max       29.1190
_cell_measurement_theta_min       3.4620
_exptl_absorpt_coefficient_mu     1.071
_exptl_absorpt_correction_T_max   1.00000
_exptl_absorpt_correction_T_min   0.79288
_exptl_absorpt_correction_type    multi-scan
_exptl_absorpt_process_details
;
CrysAlisPro, Agilent Technologies,
Version 1.171.36.24 (release 03-12-2012 CrysAlis171 .NET)
(compiled Dec  3 2012,18:21:49)
Empirical absorption correction using spherical harmonics,
 implemented in SCALE3 ABSPACK scaling algorithm.
;
_exptl_crystal_colour             'yellow'
_exptl_crystal_density_diffrn     1.5138
_exptl_crystal_description        'block'
_exptl_crystal_F_000              703.6799
_exptl_crystal_size_max           0.7
_exptl_crystal_size_mid           0.7
_exptl_crystal_size_min           0.4
_diffrn_reflns_av_R_equivalents   0.0339
_diffrn_reflns_av_unetI/netI      0.0557
_diffrn_reflns_limit_h_max        11
_diffrn_reflns_limit_h_min        -8
_diffrn_reflns_limit_k_max        15
_diffrn_reflns_limit_k_min        -15
_diffrn_reflns_limit_l_max        16
_diffrn_reflns_limit_l_min        -23
_diffrn_reflns_number             15355
_diffrn_reflns_theta_full         26.3713
_diffrn_reflns_theta_max          26.37
_diffrn_reflns_theta_min          2.78
_diffrn_ambient_temperature       150.00(10)
_diffrn_detector_area_resol_mean  10.3705
_diffrn_measured_fraction_theta_full 0.9987
_diffrn_measured_fraction_theta_max 0.9987
_diffrn_measurement_device_type   'SuperNova, Single source at offset), Atlas'
_diffrn_measurement_method        '\w scans'
_diffrn_orient_matrix_UB_11       -0.0063836000
_diffrn_orient_matrix_UB_12       -0.0001522000
_diffrn_orient_matrix_UB_13       0.0427335000
_diffrn_orient_matrix_UB_21       -0.0906891000
_diffrn_orient_matrix_UB_22       0.0260407000
_diffrn_orient_matrix_UB_23       0.0015911000
_diffrn_orient_matrix_UB_31       -0.0086596000
_diffrn_orient_matrix_UB_32       -0.0580905000
_diffrn_orient_matrix_UB_33       -0.0007173000
_diffrn_radiation_monochromator   mirror
_diffrn_radiation_type            'Mo K\a'
_diffrn_radiation_wavelength      0.7107
_diffrn_source                    'SuperNova (Mo) X-ray Source'
_reflns_Friedel_coverage          0.0
_reflns_limit_h_max               10
_reflns_limit_h_min               -10
_reflns_limit_k_max               14
_reflns_limit_k_min               -14
_reflns_limit_l_max               20
_reflns_limit_l_min               0
_reflns_number_gt                 5240
_reflns_number_total              6222
_reflns_odcompleteness_completeness 99.87
_reflns_odcompleteness_iscentric  1
_reflns_odcompleteness_theta      26.32
_reflns_threshold_expression      I>=2u(I)
_computing_cell_refinement
;
CrysAlisPro, Agilent Technologies,
Version 1.171.36.24 (release 03-12-2012 CrysAlis171 .NET)
(compiled Dec  3 2012,18:21:49)
;
_computing_data_collection
;
CrysAlisPro, Agilent Technologies,
Version 1.171.36.24 (release 03-12-2012 CrysAlis171 .NET)
(compiled Dec  3 2012,18:21:49)
;
_computing_data_reduction
;
CrysAlisPro, Agilent Technologies,
Version 1.171.36.24 (release 03-12-2012 CrysAlis171 .NET)
(compiled Dec  3 2012,18:21:49)
;
_computing_molecular_graphics
;
O. V. Dolomanov, L. J. Bourhis, R. J. Gildea, J. A. K. Howard and H. Puschmann,
OLEX2: a complete structure solution, refinement and analysis program.
J. Appl. Cryst. (2009). 42, 339-341.
;
_computing_publication_material
;
O. V. Dolomanov, L. J. Bourhis, R. J. Gildea, J. A. K. Howard and H. Puschmann,
OLEX2: a complete structure solution, refinement and analysis program.
J. Appl. Cryst. (2009). 42, 339-341.
;
_computing_structure_refinement
'L.J. Bourhis, O.V. Dolomanov, R.J. Gildea, J.A.K. Howard, H. Puschmann, in preparation (2013)'
_computing_structure_solution
'L.J. Bourhis, O.V. Dolomanov, R.J. Gildea, J.A.K. Howard, H. Puschmann, in preparation (2013)'
_refine_diff_density_max          0.6032
_refine_diff_density_min          -0.6407
_refine_diff_density_rms          0.1139
_refine_ls_d_res_high             0.8000
_refine_ls_d_res_low              7.3363
_refine_ls_goodness_of_fit_ref    1.0482
_refine_ls_hydrogen_treatment     mixed
_refine_ls_matrix_type            full
_refine_ls_number_constraints     49
_refine_ls_number_parameters      356
_refine_ls_number_reflns          6222
_refine_ls_number_restraints      0
_refine_ls_R_factor_all           0.0434
_refine_ls_R_factor_gt            0.0337
_refine_ls_restrained_S_all       1.0482
_refine_ls_shift/su_max           0.0007
_refine_ls_shift/su_mean          0.0001
_refine_ls_structure_factor_coef  Fsqd
_refine_ls_weighting_details
'w=1/[\s^2^(Fo^2^)+(0.0349P)^2^+0.3234P] where P=(Fo^2^+2Fc^2^)/3'
_refine_ls_weighting_scheme       calc
_refine_ls_wR_factor_ref          0.0827
_olex2_refinement_description
;
1. Fixed Uiso
 At 1.2 times of:
  All C(H) groups, All C(H,H) groups
 At 1.5 times of:
  All C(H,H,H) groups
2. Others
 Fixed Sof: Cl4(0.75) Cl7(0.75) C28(0.75) Cl(0.25) Cl5(0.25) C29(0.25)
3.a Secondary CH2 refined with riding coordinates:
 C4(H4a,H4b), C2(H2a,H2b), C3(H3a,H3b)
3.b Aromatic/amide H refined with riding coordinates:
 C7(H7), C18(H18), C9(H9), C26(H26), C23(H23), C16(H16), C27(H27), C25(H25)
3.c Idealised Me refined as rotating group:
 C22(H22a,H22b,H22c), C11(H11a,H11b,H11c), C13(H13a,H13b,H13c), C12(H12a,H12b,
 H12c), C20(H20a,H20b,H20c), C21(H21a,H21b,H21c)
;
_atom_sites_solution_primary      iterative
loop_
  _atom_site_label
  _atom_site_type_symbol
  _atom_site_fract_x
  _atom_site_fract_y
  _atom_site_fract_z
  _atom_site_U_iso_or_equiv
  _atom_site_adp_type
  _atom_site_occupancy
  _atom_site_refinement_flags_posn
 Pd1 Pd 0.15981(2) 0.574377(16) 0.717944(13) 0.01488(8) Uani 1.000000 .
 Cl1 Cl 0.35739(8) 0.58685(6) 0.61224(4) 0.02307(16) Uani 1.000000 .
 Cl3 Cl 0.26855(12) 0.18446(7) 0.50145(6) 0.0477(3) Uani 1.000000 .
 N3 N 0.0661(3) 0.47622(19) 0.63984(14) 0.0184(5) Uani 1.000000 .
 C7 C 0.5308(3) 0.2686(2) 0.84315(18) 0.0213(6) Uani 1.000000 .
 H7 H 0.6103(3) 0.2027(2) 0.81522(18) 0.0256(8) Uiso 1.000000 R
 C18 C -0.1972(4) 0.9636(2) 0.7334(2) 0.0277(7) Uani 1.000000 .
 H18 H -0.3104(4) 0.9841(2) 0.7568(2) 0.0333(9) Uiso 1.000000 R
 N2 N 0.3811(3) 0.60180(18) 0.83523(14) 0.0159(5) Uani 1.000000 .
 C10 C 0.2994(3) 0.4654(2) 0.92949(17) 0.0162(6) Uani 1.000000 .
 C8 C 0.4320(4) 0.2495(2) 0.91036(19) 0.0234(7) Uani 1.000000 .
 C15 C 0.1394(4) 0.9010(2) 0.66267(19) 0.0259(7) Uani 1.000000 .
 C22 C -0.1061(4) 0.8553(3) 0.8600(2) 0.0285(7) Uani 1.000000 .
 H22a H -0.2153(11) 0.9087(10) 0.8827(4) 0.0427(11) Uiso 1.000000 GR
 H22b H -0.110(2) 0.7745(6) 0.8597(2) 0.0427(11) Uiso 1.000000 GR
 H22c H -0.0176(13) 0.8604(16) 0.8917(3) 0.0427(11) Uiso 1.000000 GR
 N1 N 0.2376(3) 0.78060(18) 0.77973(14) 0.0175(5) Uani 1.000000 .
 C9 C 0.3172(3) 0.3485(2) 0.95383(18) 0.0208(6) Uani 1.000000 .
 H9 H 0.2513(3) 0.3365(2) 0.99980(18) 0.0249(7) Uiso 1.000000 R
 C11 C 0.6295(4) 0.4008(2) 0.74452(19) 0.0249(7) Uani 1.000000 .
 H11a H 0.7041(16) 0.3240(3) 0.7236(7) 0.0374(10) Uiso 1.000000 GR
 H11b H 0.5604(4) 0.4416(14) 0.7036(5) 0.0374(10) Uiso 1.000000 GR
 H11c H 0.6974(17) 0.4479(14) 0.7606(3) 0.0374(10) Uiso 1.000000 GR
 C13 C 0.1841(4) 0.5698(2) 0.98184(18) 0.0236(7) Uani 1.000000 .
 H13a H 0.1076(16) 0.5428(4) 1.0187(7) 0.0354(10) Uiso 1.000000 GR
 H13b H 0.2532(4) 0.6027(10) 1.0117(8) 0.0354(10) Uiso 1.000000 GR
 H13c H 0.1181(17) 0.6304(7) 0.9485(2) 0.0354(10) Uiso 1.000000 GR
 C1 C 0.2654(3) 0.6625(2) 0.78660(17) 0.0156(6) Uani 1.000000 .
 C26 C -0.1594(4) 0.4509(3) 0.57024(18) 0.0255(7) Uani 1.000000 .
 H26 H -0.2743(4) 0.4788(3) 0.56030(18) 0.0306(8) Uiso 1.000000 R
 C4 C 0.4934(4) 0.6539(2) 0.87641(19) 0.0233(7) Uani 1.000000 .
 H4a H 0.4462(4) 0.6743(2) 0.93208(19) 0.0279(8) Uiso 1.000000 R
 H4b H 0.6072(4) 0.5954(2) 0.87602(19) 0.0279(8) Uiso 1.000000 R
 C19 C -0.0677(4) 0.8903(2) 0.77480(19) 0.0215(6) Uani 1.000000 .
 C23 C 0.1741(4) 0.3772(2) 0.60214(18) 0.0216(6) Uani 1.000000 .
 H23 H 0.2890(4) 0.3518(2) 0.61218(18) 0.0259(8) Uiso 1.000000 R
 C16 C 0.0036(4) 0.9770(3) 0.6246(2) 0.0326(8) Uani 1.000000 .
 H16 H 0.0277(4) 1.0077(3) 0.5750(2) 0.0391(9) Uiso 1.000000 R
 C12 C 0.4524(4) 0.1242(2) 0.9390(2) 0.0386(9) Uani 1.000000 .
 H12a H 0.445(3) 0.0747(6) 0.8949(4) 0.0579(13) Uiso 1.000000 GR
 H12b H 0.5625(13) 0.0912(8) 0.9591(12) 0.0579(13) Uiso 1.000000 GR
 H12c H 0.3628(17) 0.1269(3) 0.9812(9) 0.0579(13) Uiso 1.000000 GR
 C14 C 0.1007(3) 0.8548(2) 0.73610(18) 0.0197(6) Uani 1.000000 .
 C17 C -0.1646(4) 1.0076(2) 0.6584(2) 0.0322(8) Uani 1.000000 .
 C27 C -0.0989(3) 0.5116(2) 0.62395(18) 0.0217(6) Uani 1.000000 .
 H27 H -0.1753(3) 0.5802(2) 0.65040(18) 0.0260(8) Uiso 1.000000 R
 C2 C 0.3287(4) 0.8460(2) 0.8235(2) 0.0297(8) Uani 1.000000 .
 H2a H 0.3356(4) 0.9155(2) 0.7936(2) 0.0356(9) Uiso 1.000000 R
 H2b H 0.2660(4) 0.8736(2) 0.8759(2) 0.0356(9) Uiso 1.000000 R
 C24 C 0.1198(4) 0.3114(2) 0.54857(19) 0.0253(7) Uani 1.000000 .
 C20 C 0.3224(4) 0.8787(3) 0.6258(2) 0.0393(9) Uani 1.000000 .
 H20a H 0.3315(7) 0.8576(19) 0.5696(4) 0.0589(13) Uiso 1.000000 GR
 H20b H 0.3534(10) 0.9500(7) 0.6316(12) 0.0589(13) Uiso 1.000000 GR
 H20c H 0.3985(5) 0.8142(14) 0.6528(9) 0.0589(13) Uiso 1.000000 GR
 C3 C 0.5056(4) 0.7649(3) 0.8338(2) 0.0348(8) Uani 1.000000 .
 H3a H 0.5639(4) 0.8061(3) 0.8652(2) 0.0417(10) Uiso 1.000000 R
 H3b H 0.5717(4) 0.7427(3) 0.7815(2) 0.0417(10) Uiso 1.000000 R
 C6 C 0.5155(3) 0.3837(2) 0.81548(17) 0.0183(6) Uani 1.000000 .
 C25 C -0.0491(4) 0.3485(3) 0.53129(19) 0.0273(7) Uani 1.000000 .
 H25 H -0.0870(4) 0.3057(3) 0.49464(19) 0.0328(8) Uiso 1.000000 R
 C21 C -0.3100(5) 1.0909(3) 0.6158(2) 0.0470(10) Uani 1.000000 .
 H21a H -0.345(2) 1.0452(4) 0.5773(10) 0.0705(15) Uiso 1.000000 GR
 H21b H -0.4059(11) 1.1291(16) 0.6547(3) 0.0705(15) Uiso 1.000000 GR
 H21c H -0.2708(10) 1.1509(13) 0.5884(11) 0.0705(15) Uiso 1.000000 GR
 C5 C 0.3948(3) 0.4806(2) 0.85942(17) 0.0156(6) Uani 1.000000 .
 Cl2 Cl -0.04288(8) 0.55296(6) 0.81847(4) 0.02024(15) Uani 1.000000 .
 Cl4 Cl -0.0194(3) 1.1340(2) 0.91814(14) 0.0510(6) Uani 0.750000 .
 Cl7 Cl 0.1111(3) 1.17713(14) 0.75658(11) 0.0654(5) Uani 0.750000 .
 C28 C 0.0092(7) 1.2430(5) 0.8512(3) 0.0379(12) Uiso 0.750000 .
 Cl Cl 0.2368(9) 1.1612(4) 0.7460(4) 0.0788(19) Uani 0.250000 .
 Cl5 Cl 0.0152(14) 1.1518(10) 0.8898(8) 0.124(5) Uani 0.250000 .
 C29 C 0.071(2) 1.2474(15) 0.8257(12) 0.052(5) Uiso 0.250000 .

loop_
  _atom_site_aniso_label
  _atom_site_aniso_U_11
  _atom_site_aniso_U_22
  _atom_site_aniso_U_33
  _atom_site_aniso_U_12
  _atom_site_aniso_U_13
  _atom_site_aniso_U_23
 Pd1 0.01437(12) 0.01745(12) 0.01314(13) -0.00522(8) -0.00261(9) 0.00045(8)
 Cl1 0.0198(3) 0.0358(4) 0.0153(4) -0.0119(3) 0.0003(3) -0.0009(3)
 Cl3 0.0496(5) 0.0350(4) 0.0534(6) -0.0051(4) -0.0081(5) -0.0215(4)
 N3 0.0193(12) 0.0235(12) 0.0147(13) -0.0093(10) -0.0040(10) 0.0040(10)
 C7 0.0217(15) 0.0154(13) 0.0221(17) 0.0004(11) -0.0011(13) 0.0005(12)
 C18 0.0235(16) 0.0219(14) 0.034(2) -0.0007(12) -0.0084(14) -0.0071(14)
 N2 0.0149(11) 0.0160(11) 0.0180(13) -0.0053(9) -0.0065(10) 0.0018(9)
 C10 0.0137(13) 0.0184(13) 0.0159(16) -0.0025(11) -0.0070(11) 0.0025(11)
 C8 0.0274(16) 0.0168(13) 0.0252(18) -0.0049(12) -0.0071(14) 0.0062(12)
 C15 0.0320(17) 0.0210(14) 0.0237(18) -0.0064(13) -0.0049(14) 0.0041(13)
 C22 0.0249(16) 0.0262(15) 0.030(2) -0.0038(13) 0.0010(14) 0.0003(14)
 N1 0.0182(12) 0.0160(11) 0.0197(14) -0.0057(9) -0.0071(10) 0.0025(9)
 C9 0.0208(15) 0.0244(14) 0.0173(16) -0.0068(12) -0.0046(12) 0.0044(12)
 C11 0.0208(15) 0.0236(14) 0.0260(18) -0.0024(12) 0.0018(13) 0.0022(13)
 C13 0.0258(16) 0.0225(14) 0.0190(17) -0.0038(12) 0.0008(13) -0.0002(12)
 C1 0.0130(13) 0.0189(13) 0.0137(15) -0.0050(11) 0.0038(11) 0.0007(11)
 C26 0.0209(15) 0.0422(17) 0.0174(17) -0.0150(14) -0.0046(13) 0.0076(14)
 C4 0.0181(14) 0.0281(15) 0.0264(18) -0.0083(12) -0.0121(13) 0.0016(13)
 C19 0.0243(15) 0.0150(13) 0.0251(18) -0.0053(12) -0.0053(13) -0.0013(12)
 C23 0.0206(15) 0.0242(14) 0.0203(17) -0.0066(12) -0.0051(12) 0.0019(12)
 C16 0.052(2) 0.0254(15) 0.0186(18) -0.0084(15) -0.0110(16) 0.0065(13)
 C12 0.048(2) 0.0214(15) 0.041(2) -0.0045(15) 0.0020(17) 0.0082(15)
 C14 0.0225(15) 0.0145(12) 0.0221(17) -0.0046(11) -0.0063(13) 0.0011(12)
 C17 0.0402(19) 0.0198(14) 0.033(2) -0.0001(14) -0.0198(16) -0.0027(14)
 C27 0.0193(15) 0.0300(15) 0.0168(16) -0.0095(12) -0.0020(12) 0.0040(12)
 C2 0.0310(17) 0.0204(14) 0.042(2) -0.0106(13) -0.0149(15) -0.0001(14)
 C24 0.0324(17) 0.0243(14) 0.0208(18) -0.0113(13) -0.0032(14) 0.0013(13)
 C20 0.041(2) 0.0395(19) 0.034(2) -0.0127(16) 0.0066(17) 0.0094(16)
 C3 0.0304(18) 0.0316(16) 0.049(2) -0.0160(14) -0.0156(17) 0.0045(16)
 C6 0.0180(14) 0.0200(13) 0.0163(16) -0.0044(11) -0.0040(12) 0.0021(11)
 C25 0.0360(18) 0.0372(17) 0.0178(17) -0.0229(15) -0.0080(14) 0.0026(13)
 C21 0.056(2) 0.0320(18) 0.044(2) 0.0066(17) -0.031(2) -0.0013(16)
 C5 0.0157(13) 0.0171(13) 0.0140(15) -0.0040(11) -0.0060(11) 0.0019(11)
 Cl2 0.0190(3) 0.0259(3) 0.0174(4) -0.0102(3) 0.0008(3) 0.0001(3)
 Cl4 0.0685(16) 0.0327(8) 0.0439(10) -0.0055(9) -0.0046(10) 0.0004(7)
 Cl7 0.1048(14) 0.0376(7) 0.0396(9) -0.0049(10) -0.0001(11) -0.0001(6)
 Cl 0.130(5) 0.037(2) 0.083(4) -0.032(3) -0.059(4) 0.022(2)
 Cl5 0.069(4) 0.079(7) 0.208(13) -0.017(4) 0.048(7) -0.062(7)

loop_
  _geom_bond_atom_site_label_1
  _geom_bond_atom_site_label_2
  _geom_bond_distance
  _geom_bond_site_symmetry_2
 Pd1 Cl1 2.3120(7) .
 Pd1 N3 2.101(2) .
 Pd1 C1 1.983(3) .
 Pd1 Cl2 2.3145(7) .
 Cl3 C24 1.733(3) .
 N3 C23 1.333(3) .
 N3 C27 1.342(3) .
 C7 C8 1.377(4) .
 C7 C6 1.399(4) .
 C18 C19 1.384(4) .
 C18 C17 1.384(5) .
 N2 C1 1.339(3) .
 N2 C4 1.482(3) .
 N2 C5 1.451(3) .
 C10 C9 1.397(4) .
 C10 C13 1.508(4) .
 C10 C5 1.384(4) .
 C8 C9 1.394(4) .
 C8 C12 1.510(4) .
 C15 C16 1.398(4) .
 C15 C14 1.386(4) .
 C15 C20 1.510(4) .
 C22 C19 1.507(4) .
 N1 C1 1.339(3) .
 N1 C14 1.447(3) .
 N1 C2 1.474(3) .
 C11 C6 1.488(4) .
 C26 C27 1.374(4) .
 C26 C25 1.375(4) .
 C4 C3 1.510(4) .
 C19 C14 1.403(4) .
 C23 C24 1.381(4) .
 C16 C17 1.376(5) .
 C17 C21 1.522(4) .
 C2 C3 1.492(4) .
 C24 C25 1.380(4) .
 C6 C5 1.402(4) .
 Cl4 C28 1.750(6) .
 Cl4 Cl5 0.598(11) .
 Cl4 C29 2.256(19) .
 Cl7 C28 1.769(6) .
 Cl7 Cl 0.989(6) .
 Cl7 Cl5 2.332(12) .
 Cl7 C29 1.371(19) .
 C28 Cl5 1.237(12) .
 C28 C29 0.647(18) .
 Cl C29 1.85(2) .
 Cl5 C29 1.68(2) .

loop_
  _geom_angle_atom_site_label_1
  _geom_angle_atom_site_label_2
  _geom_angle_atom_site_label_3
  _geom_angle
  _geom_angle_site_symmetry_1
  _geom_angle_site_symmetry_3
 N3 Pd1 Cl1 88.01(6) . .
 C1 Pd1 Cl1 88.10(8) . .
 C1 Pd1 N3 175.64(9) . .
 Cl2 Pd1 Cl1 176.17(2) . .
 Cl2 Pd1 N3 88.20(6) . .
 Cl2 Pd1 C1 95.67(8) . .
 C23 N3 Pd1 119.47(18) . .
 C27 N3 Pd1 122.38(19) . .
 C27 N3 C23 118.1(2) . .
 C6 C7 C8 122.2(3) . .
 C17 C18 C19 122.5(3) . .
 C4 N2 C1 124.3(2) . .
 C5 N2 C1 122.2(2) . .
 C5 N2 C4 113.2(2) . .
 C13 C10 C9 119.3(3) . .
 C5 C10 C9 118.3(2) . .
 C5 C10 C13 122.4(2) . .
 C9 C8 C7 118.9(2) . .
 C12 C8 C7 120.9(3) . .
 C12 C8 C9 120.2(3) . .
 C14 C15 C16 118.1(3) . .
 C20 C15 C16 119.5(3) . .
 C20 C15 C14 122.3(3) . .
 C14 N1 C1 121.5(2) . .
 C2 N1 C1 122.7(2) . .
 C2 N1 C14 115.4(2) . .
 C8 C9 C10 121.1(3) . .
 N2 C1 Pd1 119.73(17) . .
 N1 C1 Pd1 121.52(19) . .
 N1 C1 N2 118.4(2) . .
 C25 C26 C27 119.6(3) . .
 C3 C4 N2 109.6(2) . .
 C22 C19 C18 120.8(3) . .
 C14 C19 C18 117.6(3) . .
 C14 C19 C22 121.5(3) . .
 C24 C23 N3 121.7(3) . .
 C17 C16 C15 122.0(3) . .
 N1 C14 C15 120.1(3) . .
 C19 C14 C15 121.4(3) . .
 C19 C14 N1 118.0(3) . .
 C16 C17 C18 118.1(3) . .
 C21 C17 C18 121.0(3) . .
 C21 C17 C16 120.9(3) . .
 C26 C27 N3 122.7(3) . .
 C3 C2 N1 109.5(2) . .
 C23 C24 Cl3 118.9(2) . .
 C25 C24 Cl3 120.7(2) . .
 C25 C24 C23 120.4(3) . .
 C2 C3 C4 109.2(2) . .
 C11 C6 C7 120.6(2) . .
 C5 C6 C7 117.2(3) . .
 C5 C6 C11 122.2(2) . .
 C24 C25 C26 117.5(3) . .
 C10 C5 N2 118.5(2) . .
 C6 C5 N2 119.0(2) . .
 C6 C5 C10 122.3(2) . .
 Cl5 Cl4 C28 25.4(12) . .
 C29 Cl4 C28 11.7(5) . .
 C29 Cl4 Cl5 14.7(13) . .
 Cl Cl7 C28 117.6(5) . .
 Cl5 Cl7 C28 31.5(3) . .
 Cl5 Cl7 Cl 114.6(5) . .
 C29 Cl7 C28 18.9(7) . .
 C29 Cl7 Cl 102.0(9) . .
 C29 Cl7 Cl5 45.5(8) . .
 Cl7 C28 Cl4 111.0(3) . .
 Cl5 C28 Cl4 11.9(5) . .
 Cl5 C28 Cl7 100.2(7) . .
 C29 C28 Cl4 135.2(19) . .
 C29 C28 Cl7 43.3(17) . .
 C29 C28 Cl5 123.7(19) . .
 C29 Cl Cl7 46.5(6) . .
 Cl7 Cl5 Cl4 160.1(17) . .
 C28 Cl5 Cl4 142.7(17) . .
 C28 Cl5 Cl7 48.3(5) . .
 C29 Cl5 Cl4 160.2(18) . .
 C29 Cl5 Cl7 35.5(7) . .
 C29 Cl5 C28 18.6(7) . .
 Cl7 C29 Cl4 103.5(9) . .
 C28 C29 Cl4 33.1(15) . .
 C28 C29 Cl7 118(2) . .
 Cl C29 Cl4 114.6(8) . .
 Cl C29 Cl7 31.5(5) . .
 Cl C29 C28 142(2) . .
 Cl5 C29 Cl4 5.2(5) . .
 Cl5 C29 Cl7 98.9(11) . .
 Cl5 C29 C28 37.6(14) . .
 Cl5 C29 Cl 109.5(10) . .
